# Supplementary material for: System identification of signaling dependent gene expression with different time-scale data
Source: PLoS Comput Biol. 2017 Dec 27;13(12):e1005913. doi: 10.1371/journal.pcbi.1005913 (PMC5760096; doi:10.1371/journal.pcbi.1005913)
Supplement: S1 Table — (XLSX) [file pcbi.1005913.s005.xlsx]

## Sheet: Sheet1
Output: c-Jun		Parameters of linear ARX model
Lag numbers		0	1	2	3	4	5	6	7	8	9	10	11	12	13	14
a	c-Jun	1	-0.05636	-0.07904	0.073935	0.070735	-0.092	0.116531	-0.13228	0.190585	-0.19643	0.207077	-0.19744	0.306074	-0.25843	1.01235
b	f(pERK)	0	0.052039	0.025694	-0.26892	0.016359	0.195113	-0.06765	0.122801	-0.04977	-0.00182	0.035713	-0.01791	-0.01323	0.086729	0.038621
Output: c-Fos		Parameters of linear ARX model
Lag numbers		0	1	2	3	4	5	6	7	8	9	10	11	12	13	14
a	c-Fos	1	-0.07786	0.056408	-0.03457	0.209823	-0.25842	0.055712	-0.02816	0.252258	-0.32325	0.259837	0.003532	0.766729
b	f(pERK)	0	-0.02653	0.03919	-0.0189	-0.04503	0.01806	0.038435	0.026868	-0.01283	0.023101	0.019443	0.033891	0.001235
	f(pCREB)	0	-0.14776	0.111873	0.037569	-0.0264	0.066215	-0.00505	0.027793	0.058525	-0.00038	-0.00855	-0.00307	0.023369
Output: Egr1		Parameters of linear ARX model
Lag numbers		0	1	2	3	4	5	6	7	8	9	10	11	12	13	14
a	Egr1	1	0.028031	-0.18123	0.175479	-0.18934	0.109186	-0.08113	0.016206	0.091426	-0.16053	0.262146	-0.03481	0.89833
b	f(pERK)	0	0.07552	-0.01501	1.1e-05	-0.00963	0.081516	-0.04199	0.049849	0.000444	0.026536	0.024364	-0.01258	0.033268
Output: FosB		Parameters of linear ARX model
Lag numbers		0	1	2	3	4	5	6	7	8	9	10	11	12	13	14
a	FosB	1	0.190031	-0.24571	0.071292	-0.01971	0.112846	-0.13632	0.134731	-0.04834	0.23658	0.127913	0.561106
b	f(c-Jun)	0	0.053947	-0.03018	0.099506	-0.12046	0.031696	0.003117	0.070203	-0.15959	-0.07944	0.146465	0.057684
	f(c-Fos)	0	0.005659	-0.03262	0.034973	-0.04145	-0.00351	-0.01137	0.028906	-0.00751	0.003667	-0.01483	0.039995
Output: JunB		Parameters of linear ARX model
Lag numbers		0	1	2	3	4	5	6	7	8	9	10	11	12	13	14
a	JunB	1	-0.16094	0.035111	-0.05582	0.223199	0.343632	0.589539
b	f(pCREB)	0	-0.00514	0.047353	-0.01353	0.036709	-0.06704	0.077132
Output: Metrnl		Parameters of linear ARX model
Lag numbers		0	1	2	3	4	5	6	7	8	9	10	11	12	13	14
a	Metrnl	1	-0.04026	-0.0151	0.032951	0.038303	-0.12754	0.034873	0.273082	0.013941	-0.48672	1.11197
b	f(c-Fos)	0	-0.04262	-0.0351	0.015625	0.058139	-0.13385	-0.08975	0.041911	0.10183	0.002854	-0.05637
	f(FosB)	0	-0.12975	0.181384	-0.17231	0.142476	-0.24007	0.562778	-0.66076	0.481802	-0.04295	0.062562
	f(JunB)	0	0.029349	0.018368	-0.14392	-0.0257	0.016177	0.134842	0.173387	-0.23443	-0.07181	0.068724
Output: Serpinb1a		Parameters of linear ARX model
Lag numbers		0	1	2	3	4	5	6	7	8	9	10	11	12	13	14
a	Serpinb1a	1	0.333242	0.149619	0.305287	0.183545
b	f(JunB)	0	-0.10909	0.093476	-0.06756	0.108083
Output: Dclk1		Parameters of linear ARX model
Lag numbers		0	1	2	3	4	5	6	7	8	9	10	11	12	13	14
a	Dclk1	1	0.080289	-0.00022	0.063171	-0.10167	0.074805	-0.15236	0.054864	0.310046	0.373261
b	f(JunB)	0	0.073282	-0.12492	0.062253	-0.12569	0.14993	-0.26375	0.206572	-0.17042	0.397913
